# Supplementary material
Source: Springer Nature journal article supplement (https://www.springermedizin.de/resource/supplementary/13054_2009_8487_MOESM1_ESM.pdf/9732076)

**(a)**

Ability of Clpc to track changes in Cltd  
induced by volume expansion

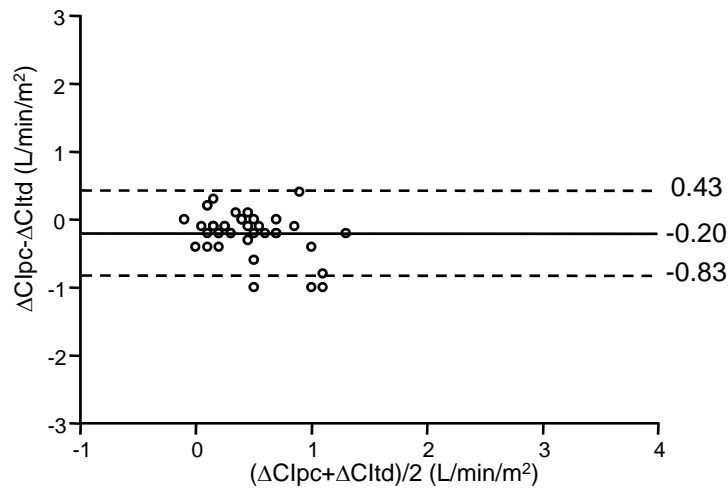**(b)**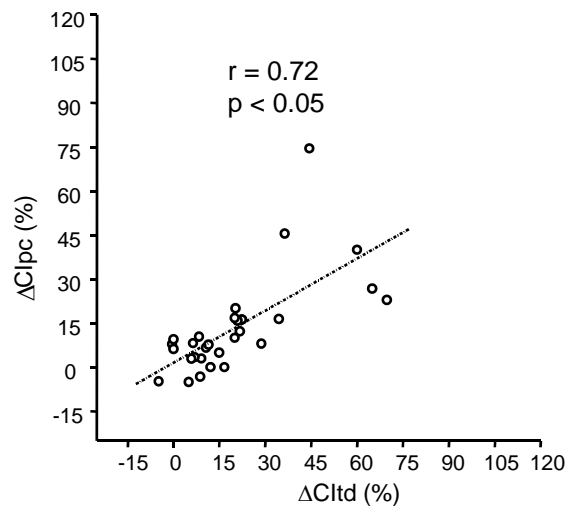**(c)**

Ability of Clpw to track changes in Cltd  
induced by volume expansion

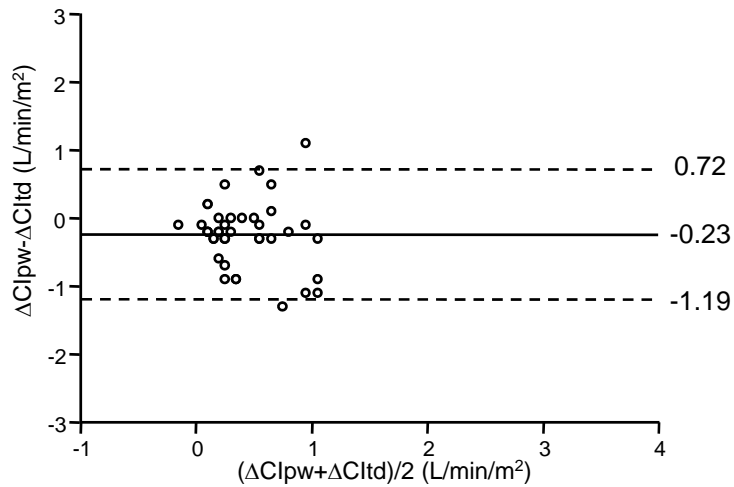**(d)**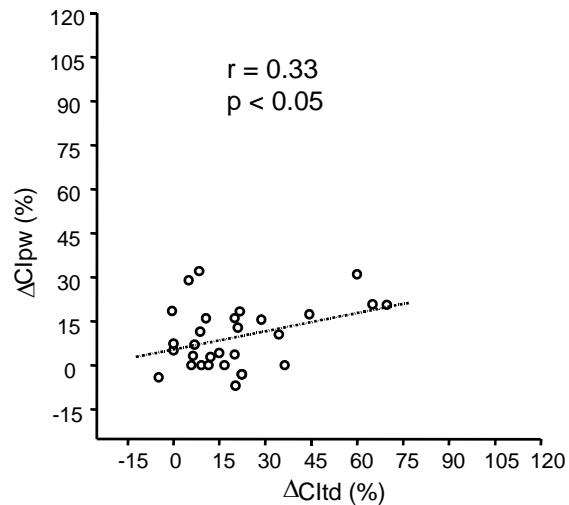

Supplement: MOESM1 [file 9732076]
